# Supplementary material for: Genetic variation for photosynthetic capacity and efficiency in spring wheat
Source: PubMed Central journal article supplement — J Exp Bot. 2019 Sep 30;71(7):2299–311. doi: 10.1093/jxb/erz439 (PMC7134913; doi:10.1093/jxb/erz439), 2019-09-30
Supplement: erz439_suppl_supplementary_tables_s1-s6.pdf [file erz439_suppl_supplementary_tables_s1-s6.pdf]

## Genetic variation for photosynthetic capacity and efficiency in spring wheat

### SUPPLEMENTARY TABLES

**Table S1 List of wheat genotypes used for early vigour set.**

| Early Vigour (EV) |           |      |
|-------------------|-----------|------|
| Gen               | Name      | Type |
| V1                | Bencubbin | BW   |
| V2                | Halberd   | BW   |
| V3                | K1056     | BW   |
| V4                | Nacozari  | BW   |
| V5                | Oasis     | BW   |
| V6                | Sunstar   | BW   |
| V7                | W010311   | BW   |
| *V8               | W020308   | BW   |
| *V9               | W100104   | BW   |
| V10               | W130114   | BW   |
| V11               | W170316   | BW   |
| V12               | W210308   | BW   |
| V13               | W610501   | BW   |
| V14               | W650208   | BW   |
| V75               | Quarrion  | BW   |
| V76               | Pitic     | BW   |

T, Triticale genotypes. DW, Durum wheat. BW, Bread wheat. \*Genotypes measured in the field in Australia (Aus3).

**Table S2 List of wheat genotypes used for BYP set.**

| <b>Gen</b>  | <b>Name</b> | <b>Type</b> |
|-------------|-------------|-------------|
| <b>*V15</b> | Abacus      | T           |
| <b>*V16</b> | Axe         | BW          |
| <b>*V17</b> | Bogong      | T           |
| <b>*V18</b> | Bolac       | BW          |
| <b>*V19</b> | Canobolas   | T           |
| <b>*V20</b> | Caparoi     | DW          |
| <b>*V21</b> | Chopper     | T           |
| <b>*V22</b> | Derrimut    | BW          |
| <b>*V23</b> | Drysdale    | BW          |
| <b>*V24</b> | Emu Rock    | BW          |
| <b>*V25</b> | Espada      | BW          |
| <b>V26</b>  | H45         | BW          |
| <b>*V27</b> | Hawkeye     | T           |
| <b>*V28</b> | Hunter      | BW          |
| <b>*V29</b> | Hyperno     | DW          |
| <b>*V30</b> | Jaywick     | T           |
| <b>*V31</b> | Kosciusko   | T           |
| <b>*V32</b> | Mace        | BW          |
| <b>*V33</b> | Magenta     | BW          |
| <b>*V34</b> | Merinda     | BW          |
| <b>*V35</b> | Pastor      | BW          |
| <b>*V36</b> | Scout       | BW          |
| <b>*V37</b> | Speedee     | T           |
| <b>*V38</b> | Spitfire    | BW          |
| <b>*V39</b> | Super Seri  | BW          |
| <b>*V40</b> | Tahara      | T           |
| <b>*V41</b> | Weebil      | BW          |
| <b>V42</b>  | Yenda       | BW          |
| <b>V43</b>  | Zebu        | BW          |
| <b>V44</b>  | Zulu        | DW          |

T, Triticale genotypes. DW, Durum wheat. BW, Bread wheat. \*Genotypes measured in the field in Australia (Aus3).

**Table S3 List of wheat genotypes used for C set.****CIMCOG Subset II (C)**

| <b>Gen</b>  | <b>Type</b> | <b>Name</b>                                                                                                                                   |
|-------------|-------------|-----------------------------------------------------------------------------------------------------------------------------------------------|
| <b>*V45</b> | BW          | BABAX/LR42//BABAX/3/VORB                                                                                                                      |
| <b>V46</b>  | BW          | BACANORA T 88                                                                                                                                 |
| <b>*V47</b> | BW          | BCN/RIALTO                                                                                                                                    |
| <b>V48</b>  | BW          | BECARD/KACHU                                                                                                                                  |
| <b>V49</b>  | BW          | BRBT1*2/KIRITATI                                                                                                                              |
| <b>*V50</b> | BW          | SAUAL/4/CROC_1/AE.SQUARROSA (205)//KAUZ/3/ATTILA/5/SAUAL                                                                                      |
| <b>V51</b>  | BW          | SAUAL/WHEAR//SAUAL                                                                                                                            |
| <b>*V52</b> | BW          | CMH79A.955/4/AGA/3/4*SN64/CNO67//INIA66/5/NAC/6/RIALTO                                                                                        |
| <b>*V53</b> | DW          | CIRNO C 2008                                                                                                                                  |
| <b>*V54</b> | BW          | CNO79//PF70354/MUS/3/PASTOR/4/BAV92*2/5/FH6-1-7                                                                                               |
| <b>*V55</b> | BW          | CROC_1/AE.SQUARROSA(205)//BORL95/3/PRL/SARA//TSI/VEE#5/4/FRET2                                                                                |
| <b>V56</b>  | BW          | KINGBIRD #1//INQALAB 91*2/TUKURU                                                                                                              |
| <b>*V57</b> | BW          | MILAN/KAUZ//PRINIA/3/BAV92                                                                                                                    |
| <b>V58</b>  | BW          | PAVON F 76                                                                                                                                    |
| <b>*V59</b> | BW          | PBW343*2/KUKUNA*2//FRTL/PIFED                                                                                                                 |
| <b>*V60</b> | BW          | PFAU/SERI.1B//AMAD/3/WAXWING                                                                                                                  |
| <b>*V61</b> | BW          | SERI M 82                                                                                                                                     |
| <b>*V62</b> | BW          | SIETE CERROS T66                                                                                                                              |
| <b>*V63</b> | BW          | SOKOLL//PBW343*2/KUKUNA/3/ATTILA/PASTOR                                                                                                       |
| <b>*V64</b> | BW          | TACUPETO F2001/SAUAL/4/BABAX/LR42//BABAX*2/3/KURUKU                                                                                           |
| <b>*V65</b> | BW          | TACUPETO F2001/BRAMBLING*2//KACHU                                                                                                             |
| <b>*V66</b> | BW          | TC870344/GUI//TEMPORALERA M 87/AGR/3/2*WBLL1                                                                                                  |
| <b>*V67</b> | BW          | TRAP#1/BOW/3/VEE/PJN//2*TUI/4/BAV92/RAYON/5/KACHU                                                                                             |
| <b>*V68</b> | BW          | UP2338*2/4/SNI/TRAP#1/3/KAUZ*2/TRAP//KAUZ/5/MILAN/KAUZ//<br>CHIL/CHUM18/6/UP2338*2/4/SNI/TRAP#1/3/KAUZ*2/TRAP//KAUZ                           |
| <b>*V69</b> | BW          | BECARD                                                                                                                                        |
| <b>V70</b>  | BW          | WBLL1*2/KURUKU*2/5/REH/HARE//2*BCN/3/CROC_1/AE.SQUARROSA(213)<br>//PGO/4/HUITES                                                               |
| <b>*V71</b> | BW          | YAV_3/SCO//JO69/CRA/3/YAV79/4/AE.SQUARROSA(498)/5/LINE1073/6/<br>KAUZ*2/4/CAR//KAL/BB/3/NAC/5/KAUZ/7/KRONSTAD F2004/8/KAUZ<br>/PASTOR//PBW343 |
| <b>*V72</b> | BW          | BECARD                                                                                                                                        |
| <b>*V73</b> | BW          | KFA/3/PFAU/WEAVER//BRAMBLING/4/PFAU/WEAVER*2//BRAMBLING                                                                                       |
| <b>V74</b>  | BW          | WBLL1*2/4/BABAX/LR42//BABAX/3/BABAX/LR42//BABAX                                                                                               |

T, Triticale genotypes. DW, Durum wheat. BW, Bread wheat. \*Genotypes measured in Australia (Aus3).

**Table S4** Model terms for each analysis

| Experiment | Fixed | Random                                             | Spatial           |
|------------|-------|----------------------------------------------------|-------------------|
| EVA_Aus1   | Fert  | Gen Row Col Block                                  |                   |
| BYPB_Aus2  | Fert  | Gen Row Col Li-Cor <sup>#</sup> Bench Block<br>Pot |                   |
| BYPB_Aus3  |       | Gen Block Plot Row Col                             |                   |
| CA_Aus3    |       | Gen Block Plot Row Col Li-Cor <sup>#</sup>         | ar1(Col):ar1(Row) |
| CB_Mex1    |       | Gen Rep Row Col Li-Cor <sup>#</sup>                | ar1(Col):ar1(Row) |
| CA_Mex1    |       | Gen Rep Row Col Li-Cor <sup>#</sup>                | ar1(Col):ar1(Row) |

Li-Cor<sup>#</sup> = Li-Cor for traits measured with different Li-Cor machines (not used for traits  $N_{mass}$ ,  $N_{area}$ , SPAD, LMA). Li-Cor aligned with Block at BYPB\_Aus3. Only 1 Li-Cor machine used at EVA\_Aus1. Fert: fertilizer treatment; Gen: genotypes; Col: column.

**Table S5** Genetic and phenotypic correlations of electron transport rate from gas exchange ( $J$ ) with chlorophyll fluorescence measured in experiment CA\_Mex1.

|                                                              | Genetic correlation | Phenotypic correlation |
|--------------------------------------------------------------|---------------------|------------------------|
| Electron transport rate (ETR)                                | 0.66                | 0.59                   |
| Photochemical efficiency of photosystem II ( $\Phi_{PSII}$ ) | 0.70                | 0.60                   |

**Table S6** Phenotypic correlation of yield with  $V_{cmax25}$ ,  $V_{cmax25}/N_{area}$  and  $J$  measured before anthesis (88-103 DAE) from Mex1 experiment (CA\_Mex1).

| Trait                                                                          | Yield |
|--------------------------------------------------------------------------------|-------|
| $A$ ( $\mu\text{mol CO}_2 \text{ m}^{-2} \text{ s}^{-1}$ )                     | -0.02 |
| $V_{cmax25}$ ( $\mu\text{mol CO}_2 \text{ m}^{-2} \text{ s}^{-1}$ )            | 0.13  |
| $V_{cmax25}/N_{area}$ ( $\mu\text{mol CO}_2 \text{ s}^{-1}(\text{g N}^{-1})$ ) | -0.09 |
| $J$ ( $\mu\text{mol e}^- \text{ m}^{-2} \text{ s}^{-1}$ )                      | 0.13  |
